# Supplementary material
Source: publisher figshare collection journal article supplement (https://tandf.figshare.com/ndownloader/files/21296010)
Supplement: Supplementary file 1 [file 21296010]

# **Study on the stabilization mechanisms of wet-milled cepharanthine nanosuspensions using systematical characterization**

Tingting Fu<sup>a</sup>, Xiangshuai Gu<sup>a</sup>, Qiang Liu<sup>a</sup>, Xiaodong Peng<sup>a\*</sup>, Jianhong Yang<sup>ab\*</sup>

*<sup>a</sup> Department of Pharmaceutics, School of Pharmacy, Ningxia Medical University, No. 1160, Shengli Street, Yinchuan, 750004, China*

*<sup>b</sup> Key Laboratory of Hui Ethnic Medicine Modernization, Ministry of Education, Ningxia Medical University, Yinchuan, 750004, China*

\*Corresponding Author

Prof. Jianhong Yang Ph D

<sup>a</sup> Department of Pharmaceutics, School of Pharmacy, Ningxia Medical University, No. 1160, Shengli Street, Yinchuan, 750004, China;

<sup>b</sup> Key Laboratory of Hui Ethnic Medicine Modernization, Ministry of Education, Ningxia Medical University, Yinchuan, 750004, China.

E-mail: [pharmacy217@163.com](mailto:pharmacy217@163.com) Tel/Fax: +86-09516980188

**Supplementary Figure:**

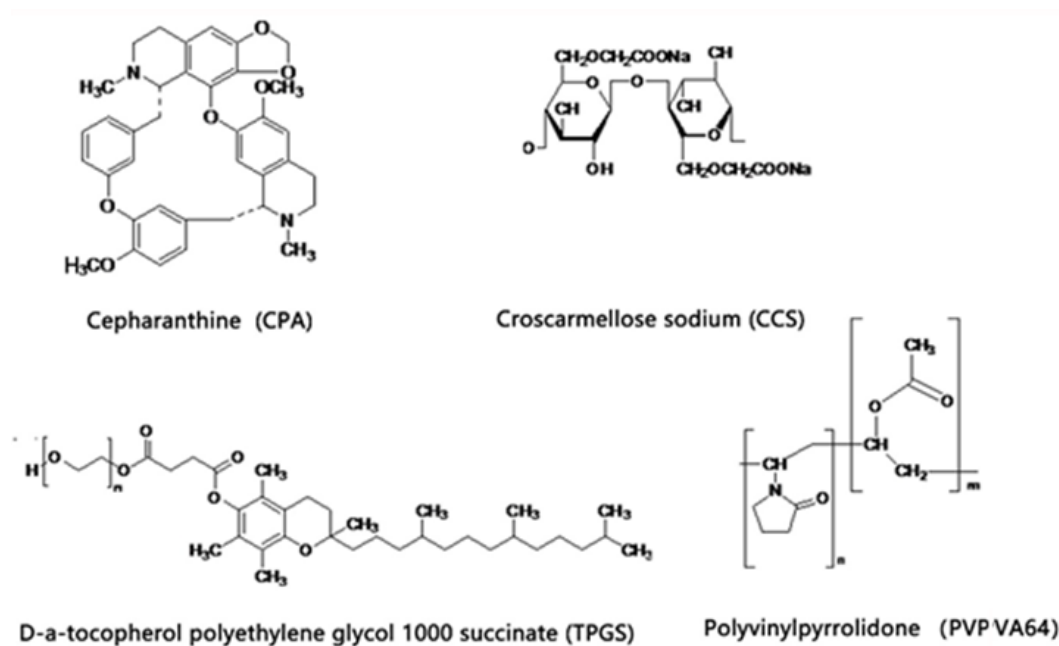

Figure S1 Chemical structures of Cepharanthine (A), CCS (B), TPGS (C) and PVP VA64 (D).

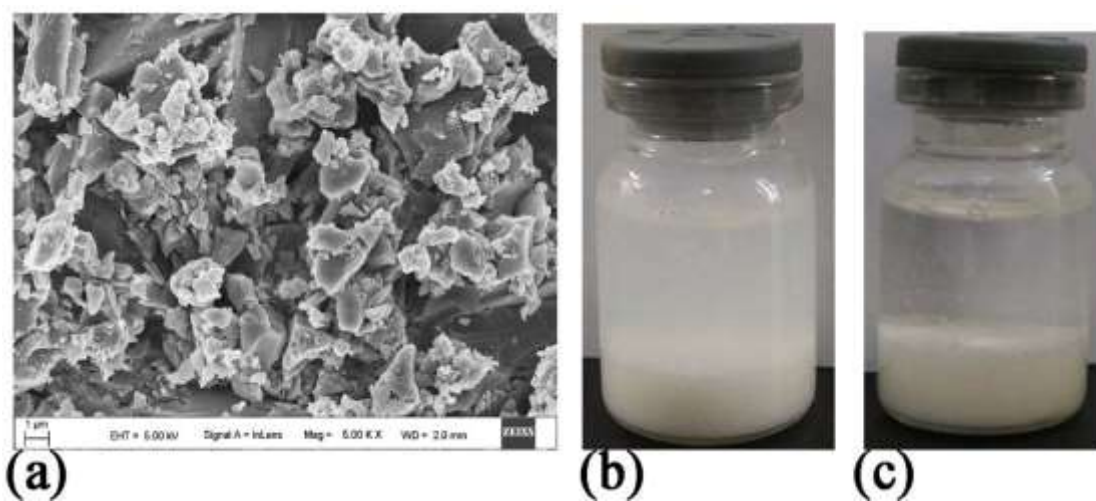

Figure S2. SEM image of raw CPA(a), representative images of milled suspension without stabilizer during storage within 1 min (b) and 15 min (c) at 4 °C.

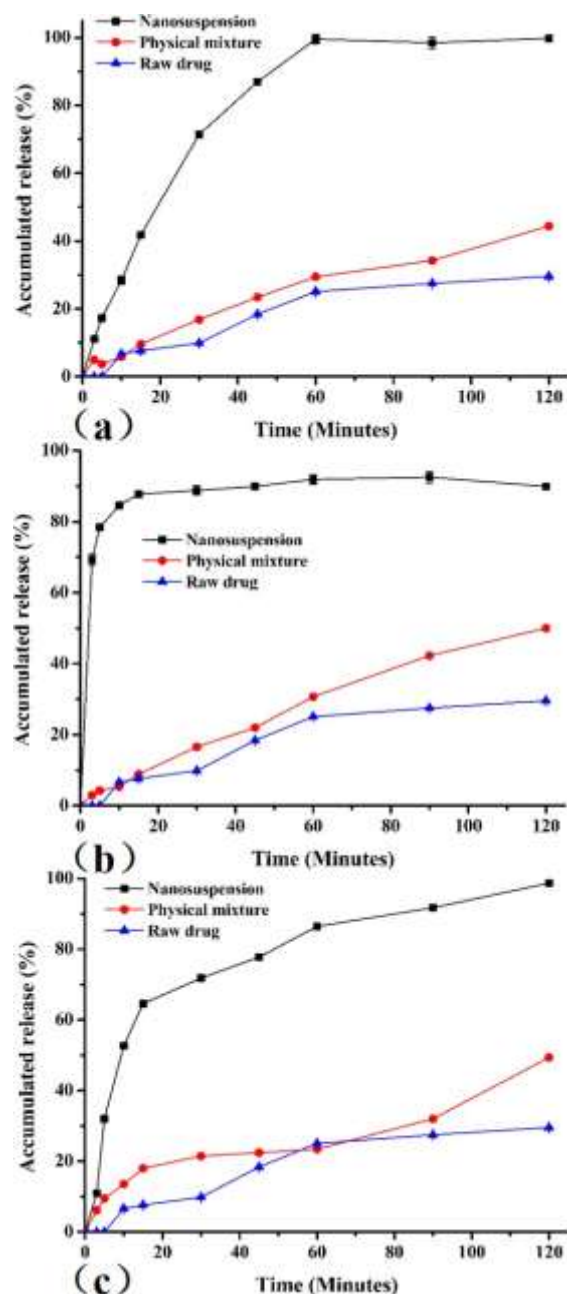

Figure S3 Dissolution profiles of different formulations. (a) Dissolution profiles of raw drug, CCS-CPA physical mixture and corresponding nanosuspension. (b) Dissolution profiles of raw drug, TPGS-CPA physical mixture and corresponding nanosuspension. (c) Dissolution profiles of raw drug, PVP VA64-CPA physical mixture and corresponding nanosuspension.

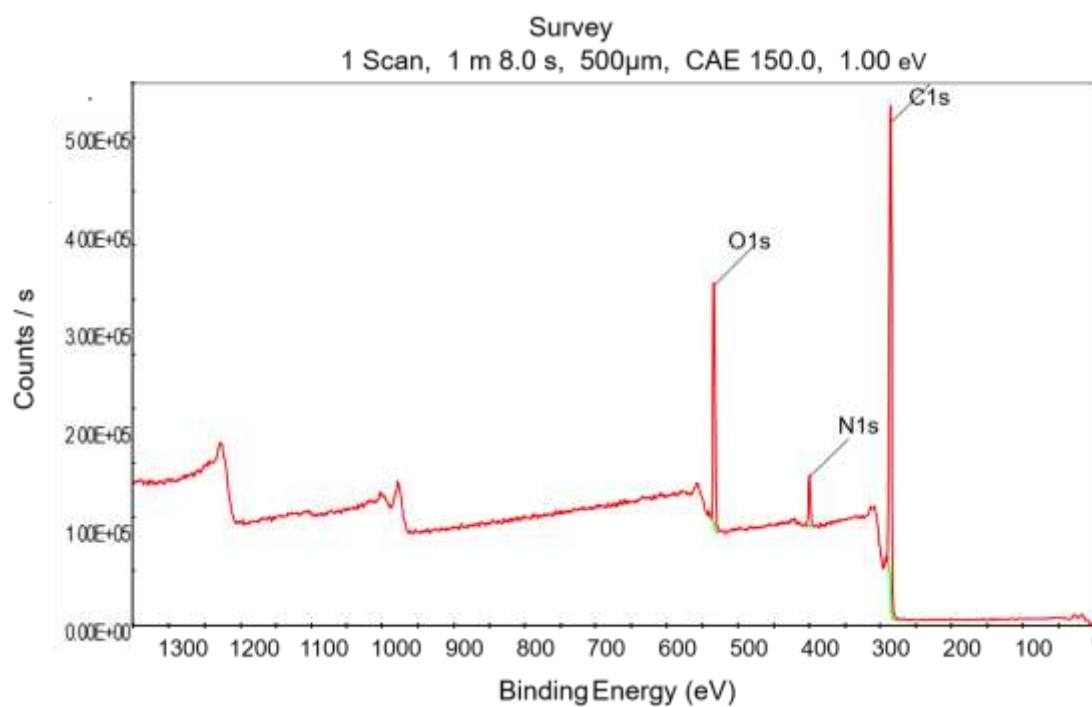

(a)

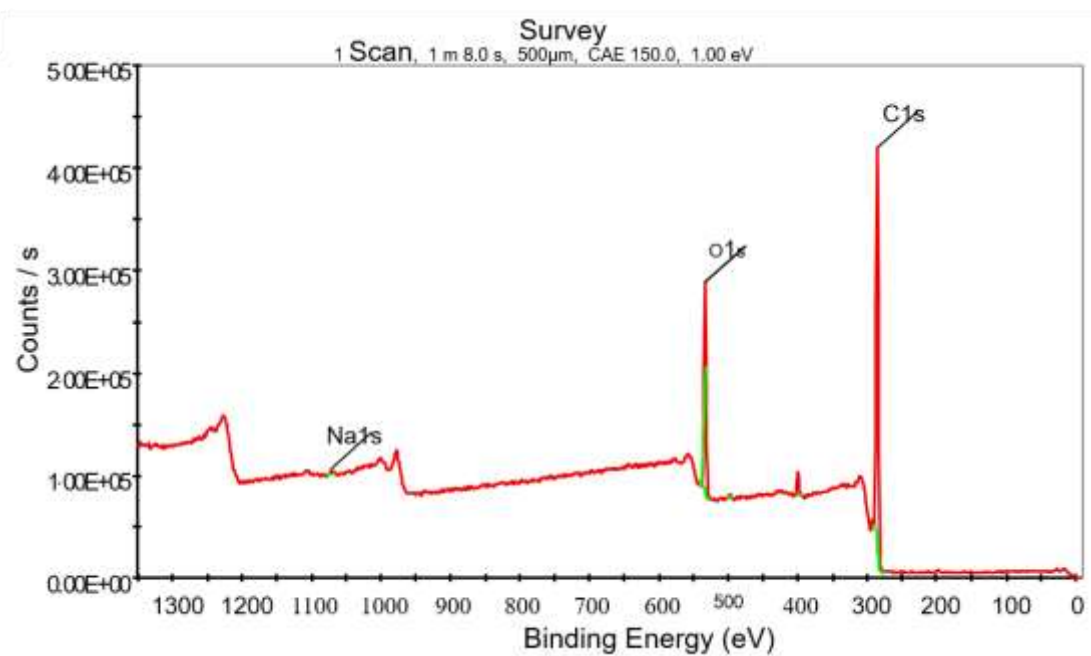

(b)

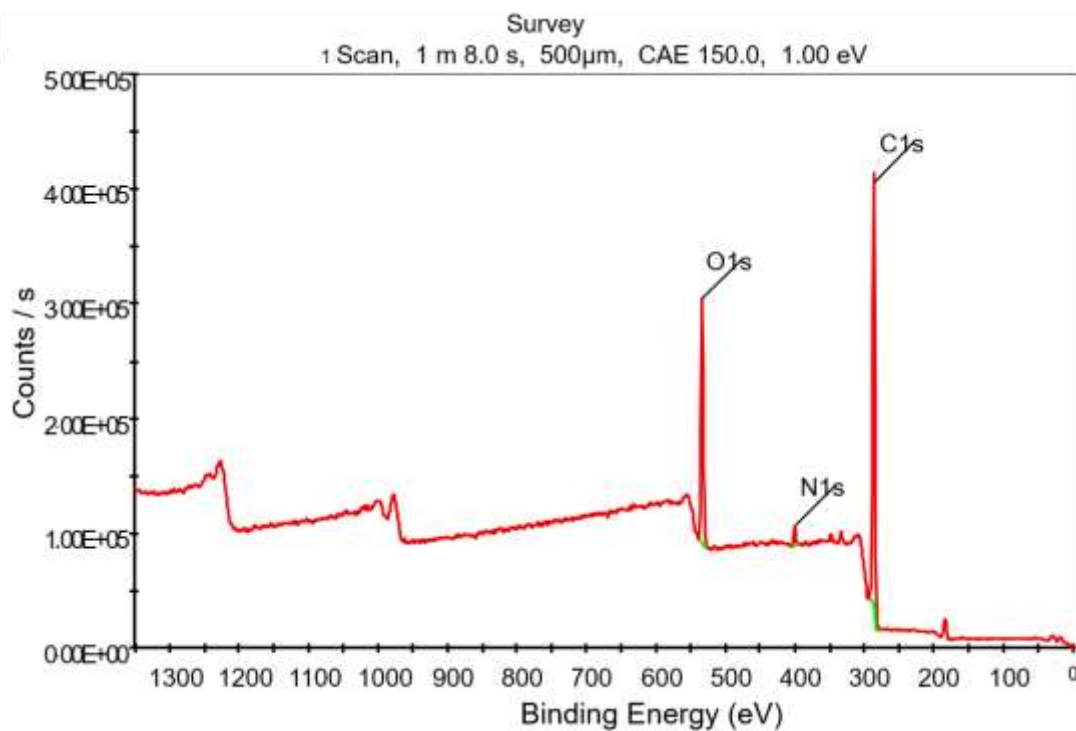

(c)

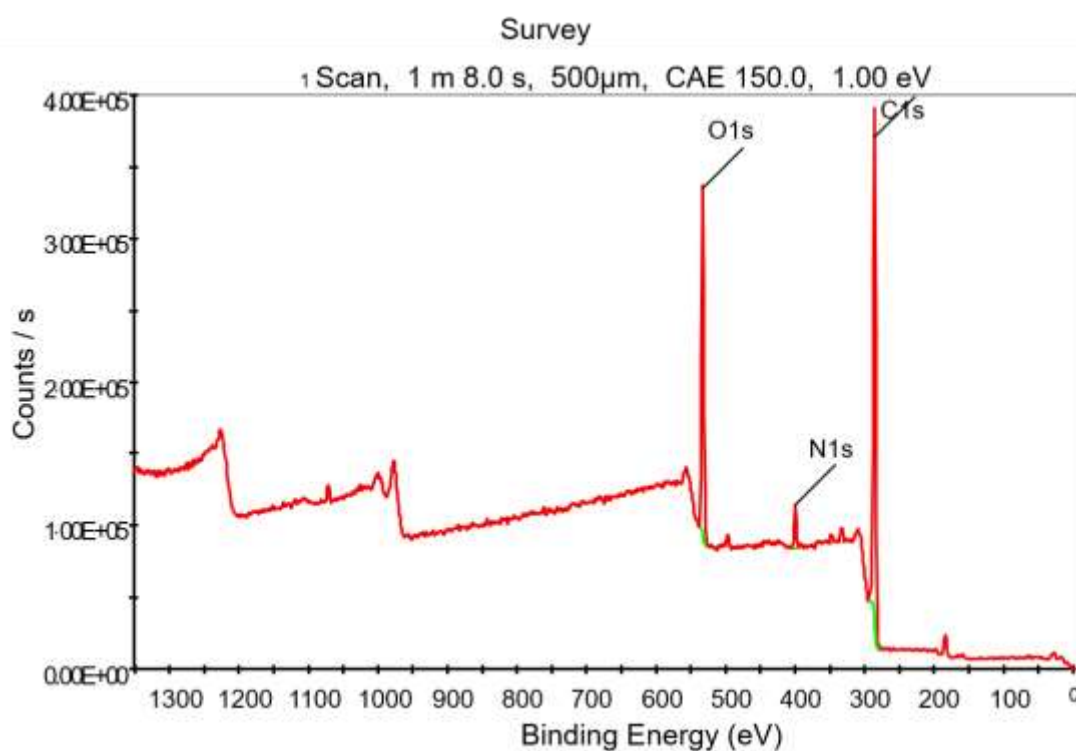

(d)

Figure S4 Survey scan (0-1300 eV) scanning of pure CPA (a), CCS-CPA NS (b), TPGS-CPA NS (c) and PVP VA64-CPA NS (d).

## Supplementary Tables

Table S1. Formulations and process parameters of the milled drug suspensions.

| Formulation     | Stabilizer | Rotating speed<br>(rpm) | Time<br>(min) | Drug: Stabilizer<br>(w/w) |
|-----------------|------------|-------------------------|---------------|---------------------------|
| CCS-CPA NS      | CCS        | 2400                    | 30            | 5:1                       |
| TPGS-CPA NS     | TPGS       | 2400                    | 30            | 5:1                       |
| PVP VA64-CPA NS | PVP VA64   | 2400                    | 30            | 5:1                       |

Table S2. Similarity factor values of each two of release profiles from pure CPA, physical mixture and nanosuspension.

| Formulation                   | $f_2$ |       |          |
|-------------------------------|-------|-------|----------|
|                               | CCS   | TPGS  | PVP VA64 |
| physical mixture <sup>a</sup> | 57.32 | 59.28 | 58.14    |
| Nanosuspensions <sup>b</sup>  | 14.92 | 9.65  | 36.21    |

a: compared with pure CPA

b: compared with the corresponding physical mixture
